# Supplementary material for: Adherence and invasive properties of Corynebacterium diphtheriae strains correlates with the predicted membrane-associated and secreted proteome
Source: PubMed Central journal article supplement (PMC4600297; doi:10.1186/s12864-015-1980-8), 2015-10-09
Supplement: 12864_2015_1980_MOESM1_ESM.pdf [file 12864_2015_1980_MOESM1_ESM.pdf]

Table S1. List of strains specific genes in ISS 3319, ISS 4060, ISS 4746 and ISS 4749

| Strain   | Locus      | Function                                  | COG Code |
|----------|------------|-------------------------------------------|----------|
| ISS 3319 | AL06_00195 | type I restriction endonuclease subunit S | V        |
| ISS 3319 | AL06_00225 | hypothetical protein                      |          |
| ISS 3319 | AL06_00630 | hypothetical protein                      |          |
| ISS 3319 | AL06_00665 | transposase                               |          |
| ISS 3319 | AL06_00670 | hypothetical protein                      |          |
| ISS 3319 | AL06_00970 | hypothetical protein                      | K        |
| ISS 3319 | AL06_00975 | hypothetical protein                      |          |
| ISS 3319 | AL06_01315 | hypothetical protein                      |          |
| ISS 3319 | AL06_01480 | hypothetical protein                      |          |
| ISS 3319 | AL06_01490 | hypothetical protein                      |          |
| ISS 3319 | AL06_01865 | hypothetical protein                      |          |
| ISS 3319 | AL06_01890 | hypothetical protein                      |          |
| ISS 3319 | AL06_02695 | transposase                               | H        |
| ISS 3319 | AL06_02700 | hypothetical protein                      |          |
| ISS 3319 | AL06_02705 | hypothetical protein                      |          |
| ISS 3319 | AL06_02715 | transposase                               |          |
| ISS 3319 | AL06_02720 | hypothetical protein                      |          |
| ISS 3319 | AL06_02730 | cell filamentation protein Fic            | D, S     |
| ISS 3319 | AL06_02735 | hypothetical protein                      |          |
| ISS 3319 | AL06_02740 | hypothetical protein                      |          |
| ISS 3319 | AL06_02745 | DNA methyltransferase                     | V        |
| ISS 3319 | AL06_02750 | hypothetical protein                      |          |
| ISS 3319 | AL06_02755 | hypothetical protein                      |          |
| ISS 3319 | AL06_02760 | ATP-dependent helicase                    |          |
| ISS 3319 | AL06_02815 | hypothetical protein                      |          |
| ISS 3319 | AL06_03145 | hypothetical protein                      |          |
| ISS 3319 | AL06_03165 | hypothetical protein                      |          |
| ISS 3319 | AL06_03760 | hypothetical protein                      |          |
| ISS 3319 | AL06_03845 | hypothetical protein                      |          |
| ISS 3319 | AL06_04085 | hypothetical protein                      |          |
| ISS 3319 | AL06_04565 | transposase                               |          |
| ISS 3319 | AL06_04760 | ABC transporter ATP-binding protein       | P        |
| ISS 3319 | AL06_04770 | hypothetical protein                      |          |
| ISS 3319 | AL06_05150 | hypothetical protein                      |          |
| ISS 3319 | AL06_05525 | hypothetical protein                      | T        |
| ISS 3319 | AL06_05530 | hypothetical protein                      | T        |
| ISS 3319 | AL06_05590 | hypothetical protein                      |          |
| ISS 3319 | AL06_07200 | hypothetical protein                      |          |
| ISS 3319 | AL06_08225 | hypothetical protein                      |          |
| ISS 3319 | AL06_08575 | surface-anchored membrane protein         |          |
| ISS 3319 | AL06_08700 | hypothetical protein                      |          |
| ISS 3319 | AL06_08945 | hypothetical protein                      |          |
| ISS 3319 | AL06_08970 | hypothetical protein                      | E        |
| ISS 3319 | AL06_09065 | hypothetical protein                      |          |
| ISS 3319 | AL06_09075 | hypothetical protein                      |          |
| ISS 3319 | AL06_09410 | hypothetical protein                      |          |
| ISS 3319 | AL06_09415 | hypothetical protein                      |          |

| Strain   | Locus      | Function                                      | COG Code |
|----------|------------|-----------------------------------------------|----------|
| ISS 3319 | AL06_09420 | cadmium transporter                           | P        |
| ISS 3319 | AL06_09425 | ArsR family transcriptional regulator         | K        |
| ISS 3319 | AL06_09430 | hypothetical protein                          |          |
| ISS 3319 | AL06_09435 | hypothetical protein                          |          |
| ISS 3319 | AL06_09445 | hypothetical protein                          |          |
| ISS 3319 | AL06_09450 | hypothetical protein                          |          |
| ISS 3319 | AL06_09455 | hypothetical protein                          |          |
| ISS 3319 | AL06_09830 | hypothetical protein                          |          |
| ISS 3319 | AL06_09985 | surface-anchored fimbrial subunit             |          |
| ISS 3319 | AL06_09995 | lipase                                        |          |
| ISS 3319 | AL06_10060 | hypothetical protein                          |          |
| ISS 3319 | AL06_10160 | acetyltransferase                             | R        |
| ISS 3319 | AL06_10245 | hypothetical protein                          |          |
| ISS 3319 | AL06_10250 | hypothetical protein                          |          |
| ISS 3319 | AL06_10255 | ABC transporter                               | P        |
| ISS 3319 | AL06_10260 | hypothetical protein                          |          |
| ISS 3319 | AL06_10265 | hypothetical protein                          | R        |
| ISS 3319 | AL06_10270 | hypothetical protein                          | R        |
| ISS 3319 | AL06_10275 | hypothetical protein                          | R        |
| ISS 3319 | AL06_10280 | hypothetical protein                          |          |
| ISS 3319 | AL06_10290 | transposase                                   | L        |
| ISS 3319 | AL06_10410 | hypothetical protein                          |          |
| ISS 3319 | AL06_10420 | hypothetical protein                          |          |
| ISS 3319 | AL06_10455 | hypothetical protein                          | O        |
| ISS 3319 | AL06_10515 | hypothetical protein                          |          |
| ISS 3319 | AL06_10605 | hypothetical protein                          |          |
| ISS 3319 | AL06_10745 | hypothetical protein                          |          |
| ISS 3319 | AL06_10750 | multidrug ABC transporter ATP-binding protein | V        |
| ISS 3319 | AL06_10755 | multidrug ABC transporter ATP-binding protein | V        |
| ISS 3319 | AL06_10760 | hypothetical protein                          |          |
| ISS 3319 | AL06_10765 | hypothetical protein                          |          |
| ISS 3319 | AL06_10770 | ABC transporter substrate-binding protein     | E        |
| ISS 3319 | AL06_10775 | ABC transporter permease                      | E, P     |
| ISS 3319 | AL06_10780 | ABC transporter permease                      | E, P     |
| ISS 3319 | AL06_10885 | hypothetical protein                          |          |
| ISS 3319 | AL06_10895 | hypothetical protein                          |          |
| ISS 3319 | AL06_10995 | DNA-binding protein                           | S        |
| ISS 3319 | AL06_11010 | hypothetical protein                          |          |
| ISS 3319 | AL06_11015 | hypothetical protein                          |          |
| ISS 3319 | AL06_11020 | hypothetical protein                          |          |
| ISS 3319 | AL06_11025 | toxin HicA                                    |          |
| ISS 3319 | AL06_11030 | transposase                                   | T        |
| ISS 3319 | AL06_11040 | membrane protein                              |          |
| ISS 3319 | AL06_11045 | cupin                                         | S        |
| ISS 3319 | AL06_11050 | carboxymuconolactone decarboxylase            | S        |
| ISS 3319 | AL06_11055 | hypothetical protein                          | S        |
| ISS 3319 | AL06_11060 | 2,5-diketo-D-gluconic acid reductase          | R        |
| ISS 3319 | AL06_11065 | transcriptional regulator                     | K        |
| ISS 3319 | AL06_11075 | hypothetical protein                          |          |

| Strain   | Locus      | Function                                                   | COG Code |
|----------|------------|------------------------------------------------------------|----------|
| ISS 3319 | AL06_11105 | hypothetical protein                                       |          |
| ISS 3319 | AL06_11215 | hypothetical protein                                       | R        |
| ISS 3319 | AL06_11220 | quinolinate synthetase                                     | H        |
| ISS 3319 | AL06_11225 | L-aspartate oxidase                                        | E        |
| ISS 3319 | AL06_11230 | nicotinate-nucleotide pyrophosphorylase                    | H        |
| ISS 3319 | AL06_11305 | TetR family transcriptional regulator                      | K        |
| ISS 3319 | AL06_11365 | hypothetical protein                                       |          |
| ISS 4060 | AL07_00105 | preprotein translocase subunit                             | S        |
| ISS 4060 | AL07_00215 | hypothetical protein                                       |          |
| ISS 4060 | AL07_00410 | mercuric reductase                                         | C        |
| ISS 4060 | AL07_00415 | redoxin                                                    | C, O     |
| ISS 4060 | AL07_00420 | cytochrome C biogenesis protein                            | C, O     |
| ISS 4060 | AL07_00425 | hypothetical protein                                       |          |
| ISS 4060 | AL07_00430 | MerR family transcriptional regulator                      | K        |
| ISS 4060 | AL07_00435 | alkyl hydroperoxide reductase                              |          |
| ISS 4060 | AL07_00440 | hypothetical protein                                       |          |
| ISS 4060 | AL07_00450 | cation transporter                                         | P        |
| ISS 4060 | AL07_00455 | cation transporter                                         | P        |
| ISS 4060 | AL07_00460 | BetI family transcriptional regulator                      | K        |
| ISS 4060 | AL07_00465 | FAD-dependent pyridine nucleotide-disulfide oxidoreductase | G, P     |
| ISS 4060 | AL07_00470 | ArsR family transcriptional regulator                      | K        |
| ISS 4060 | AL07_00475 | arsenite transporter                                       | P        |
| ISS 4060 | AL07_00480 | arsenate reductase                                         | T        |
| ISS 4060 | AL07_00485 | hypothetical protein                                       |          |
| ISS 4060 | AL07_00490 | membrane protein                                           | R        |
| ISS 4060 | AL07_00495 | ArsR family transcriptional regulator                      | K        |
| ISS 4060 | AL07_00500 | hypothetical protein                                       |          |
| ISS 4060 | AL07_00505 | hypothetical protein                                       |          |
| ISS 4060 | AL07_00760 | hypothetical protein                                       |          |
| ISS 4060 | AL07_00775 | transposase                                                |          |
| ISS 4060 | AL07_00780 | hypothetical protein                                       |          |
| ISS 4060 | AL07_00790 | hypothetical protein                                       |          |
| ISS 4060 | AL07_00795 | hypothetical protein                                       |          |
| ISS 4060 | AL07_00800 | hypothetical protein                                       |          |
| ISS 4060 | AL07_01010 | hypothetical protein                                       |          |
| ISS 4060 | AL07_01025 | hypothetical protein                                       |          |
| ISS 4060 | AL07_01070 | hypothetical protein                                       |          |
| ISS 4060 | AL07_01100 | hypothetical protein                                       |          |
| ISS 4060 | AL07_01160 | hypothetical protein                                       |          |
| ISS 4060 | AL07_01235 | hypothetical protein                                       | L        |
| ISS 4060 | AL07_01285 | transposase                                                |          |
| ISS 4060 | AL07_01290 | surface-anchored fimbrial subunit                          | M        |
| ISS 4060 | AL07_01565 | hypothetical protein                                       |          |
| ISS 4060 | AL07_01575 | DEAD/DEAH box helicase                                     | V        |
| ISS 4060 | AL07_01580 | restriction endonuclease subunit S                         | V        |
| ISS 4060 | AL07_01585 | toxin Fic                                                  | R        |
| ISS 4060 | AL07_01595 | hypothetical protein                                       | R        |
| ISS 4060 | AL07_01665 | transposase                                                | L        |
| ISS 4060 | AL07_02185 | hypothetical protein                                       |          |

| Strain   | Locus      | Function                                           | COG Code |
|----------|------------|----------------------------------------------------|----------|
| ISS 4060 | AL07_02190 | hypothetical protein                               |          |
| ISS 4060 | AL07_02205 | hypothetical protein                               |          |
| ISS 4060 | AL07_02210 | transposase                                        |          |
| ISS 4060 | AL07_02690 | hypothetical protein                               | O        |
| ISS 4060 | AL07_02925 | iron complex transporter substrate-binding protein | P        |
| ISS 4060 | AL07_03040 | cell-surface hemin receptor                        |          |
| ISS 4060 | AL07_03045 | transposase                                        | L        |
| ISS 4060 | AL07_03050 | hypothetical protein                               |          |
| ISS 4060 | AL07_03055 | hypothetical protein                               |          |
| ISS 4060 | AL07_03080 | hypothetical protein                               |          |
| ISS 4060 | AL07_03235 | hypothetical protein                               |          |
| ISS 4060 | AL07_04310 | calcium-binding protein                            |          |
| ISS 4060 | AL07_05235 | hypothetical protein                               | L        |
| ISS 4060 | AL07_05580 | hypothetical protein                               |          |
| ISS 4060 | AL07_06465 | hypothetical protein                               | K, L     |
| ISS 4060 | AL07_06720 | hypothetical protein                               |          |
| ISS 4060 | AL07_06900 | hypothetical protein                               |          |
| ISS 4060 | AL07_07415 | formate/nitrite transporter protein                | P        |
| ISS 4060 | AL07_07930 | transposase                                        | L        |
| ISS 4060 | AL07_07935 | DNA methylase                                      | L        |
| ISS 4060 | AL07_07940 | type III restriction enzyme                        | S, K, L  |
| ISS 4060 | AL07_07945 | hypothetical protein                               |          |
| ISS 4060 | AL07_07950 | hypothetical protein                               |          |
| ISS 4060 | AL07_08480 | hypothetical protein                               |          |
| ISS 4060 | AL07_08770 | hypothetical protein                               |          |
| ISS 4060 | AL07_09455 | hypothetical protein                               |          |
| ISS 4060 | AL07_09520 | hypothetical protein                               |          |
| ISS 4060 | AL07_09630 | hypothetical protein                               |          |
| ISS 4060 | AL07_09645 | hypothetical protein                               |          |
| ISS 4060 | AL07_09675 | transposase ISRM3                                  |          |
| ISS 4060 | AL07_09680 | hypothetical protein                               |          |
| ISS 4060 | AL07_09700 | transposase                                        |          |
| ISS 4060 | AL07_09705 | transposase                                        |          |
| ISS 4060 | AL07_09735 | hypothetical protein                               |          |
| ISS 4060 | AL07_09895 | hypothetical protein                               | S        |
| ISS 4060 | AL07_09900 | hypothetical protein                               |          |
| ISS 4060 | AL07_09905 | hypothetical protein                               |          |
| ISS 4060 | AL07_09910 | hypothetical protein                               |          |
| ISS 4060 | AL07_09915 | hypothetical protein                               |          |
| ISS 4060 | AL07_10055 | hypothetical protein                               |          |
| ISS 4060 | AL07_10095 | hypothetical protein                               |          |
| ISS 4060 | AL07_10100 | heat-shock protein                                 | O        |
| ISS 4060 | AL07_10125 | hypothetical protein                               |          |
| ISS 4060 | AL07_10255 | hypothetical protein                               |          |
| ISS 4060 | AL07_10270 | hypothetical protein                               |          |
| ISS 4060 | AL07_10280 | transposase                                        |          |
| ISS 4060 | AL07_10325 | hypothetical protein                               |          |
| ISS 4060 | AL07_10520 | hypothetical protein                               |          |
| ISS 4060 | AL07_10525 | hypothetical protein                               |          |

| Strain   | Locus      | Function                                 | COG Code |
|----------|------------|------------------------------------------|----------|
| ISS 4060 | AL07_10530 | collagen-binding protein                 |          |
| ISS 4060 | AL07_10535 | hypothetical protein                     |          |
| ISS 4060 | AL07_10540 | endo-beta-N-acetylglucosaminidase        |          |
| ISS 4060 | AL07_10635 | hypothetical protein                     |          |
| ISS 4060 | AL07_10640 | hypothetical protein                     | L        |
| ISS 4060 | AL07_10645 | hypothetical protein                     |          |
| ISS 4060 | AL07_10650 | ABC transporter permease                 | P        |
| ISS 4060 | AL07_10655 | ABC transporter ATP-binding protein      | P        |
| ISS 4060 | AL07_10660 | iron ABC transporter ATP-binding protein | V        |
| ISS 4060 | AL07_10665 | ABC transporter                          | V        |
| ISS 4060 | AL07_10670 | TetR family transcriptional regulator    | K        |
| ISS 4060 | AL07_10675 | hypothetical protein                     |          |
| ISS 4060 | AL07_10680 | hypothetical protein                     |          |
| ISS 4060 | AL07_10685 | hypothetical protein                     |          |
| ISS 4060 | AL07_10695 | transposase                              |          |
| ISS 4060 | AL07_10700 | hypothetical protein                     |          |
| ISS 4060 | AL07_10705 | hypothetical protein                     |          |
| ISS 4060 | AL07_10710 | plasmid maintenance system killer        | R        |
| ISS 4060 | AL07_10715 | transcriptional regulator                | R        |
| ISS 4060 | AL07_10720 | hypothetical protein                     | P        |
| ISS 4060 | AL07_10730 | hypothetical protein                     | J, D     |
| ISS 4060 | AL07_10740 | hypothetical protein                     | V        |
| ISS 4060 | AL07_10755 | transposase                              |          |
| ISS 4060 | AL07_11170 | hypothetical protein                     | V        |
| ISS 4060 | AL07_11185 | hypothetical protein                     |          |
| ISS 4060 | AL07_11420 | hypothetical protein                     |          |
| ISS 4060 | AL07_11430 | transposase                              | L        |
| ISS 4060 | AL07_11435 | hypothetical protein                     | S, F     |
| ISS 4060 | AL07_11450 | hypothetical protein                     |          |
| ISS 4060 | AL07_11475 | hypothetical protein                     |          |
| ISS 4746 | AL08_00005 | hypothetical protein                     | L        |
| ISS 4746 | AL08_00010 | hypothetical protein                     |          |
| ISS 4746 | AL08_02185 | hypothetical protein                     | D        |
| ISS 4746 | AL08_02510 | hypothetical protein                     |          |
| ISS 4746 | AL08_03065 | MerR family transcriptional regulator    | K        |
| ISS 4746 | AL08_03070 | sulfate permease                         | P        |
| ISS 4746 | AL08_03075 | hypothetical protein                     |          |
| ISS 4746 | AL08_03080 | relaxase                                 |          |
| ISS 4746 | AL08_03085 | mobilization protein                     |          |
| ISS 4746 | AL08_03090 | hypothetical protein                     |          |
| ISS 4746 | AL08_03095 | hypothetical protein                     |          |
| ISS 4746 | AL08_03100 | hypothetical protein                     |          |
| ISS 4746 | AL08_03105 | hypothetical protein                     |          |
| ISS 4746 | AL08_03110 | hypothetical protein                     |          |
| ISS 4746 | AL08_03115 | hypothetical protein                     |          |
| ISS 4746 | AL08_03125 | hypothetical protein                     |          |
| ISS 4746 | AL08_03190 | hypothetical protein                     |          |
| ISS 4746 | AL08_03225 | transposase                              |          |
| ISS 4746 | AL08_05900 | hypothetical protein                     |          |

| Strain              | Locus                  | Function                          | COG Code |
|---------------------|------------------------|-----------------------------------|----------|
| ISS 4746            | AL08_05985             | hypothetical protein              |          |
| ISS 4746            | AL08_06995             | hypothetical protein              |          |
| ISS 4746            | AL08_07000             | hypothetical protein              |          |
| ISS 4746            | AL08_07010             | hypothetical protein              |          |
| ISS 4746            | AL08_07015             | hypothetical protein              |          |
| ISS 4746            | AL08_09610             | hypothetical protein              | M        |
| ISS 4746            | AL08_10210             | transposase                       | L        |
| ISS 4746            | AL08_11400             | hypothetical protein              |          |
| ISS 4746            | AL08_11420             | integrase                         |          |
| ISS 4746            | AL08_11445             | transposase                       | L        |
| ISS 4746            | AL08_11460             | hypothetical protein              |          |
| ISS 4749            | AL09_00065             | hypothetical protein              | L        |
| ISS 4749            | AL09_00210             | hypothetical protein              |          |
| ISS 4749            | AL09_00395             | transposase IS3525                | L        |
| ISS 4749            | AL09_00850             | hypothetical protein              |          |
| ISS 4749            | AL09_02710             | hypothetical protein              |          |
| ISS 4749            | AL09_04220             | RNA pseudouridine synthase        | J        |
| ISS 4749            | AL09_05750             | membrane protein                  | S        |
| ISS 4749            | AL09_09385             | surface anchored protein          |          |
| ISS 4749            | AL09_09400             | hypothetical protein              |          |
| ISS 4749            | AL09_09645             | hydrolase                         | R        |
| ISS 4749            | AL09_10005             | hypothetical protein              |          |
| ISS 4749            | AL09_10140             | hypothetical protein              | M        |
| ISS 4749            | AL09_10520             | hypothetical protein              | G        |
| ISS 4749            | AL09_11300             | hypothetical protein              | L        |
| ISS 4749            | AL09_11335             | hypothetical protein              |          |
| ISS 4746 - ISS 4749 | AL08_00520, AL09_00725 | hypothetical protein              |          |
| ISS 4746 - ISS 4749 | AL08_00525, AL09_00730 | type-2 fimbrial major subunit     |          |
| ISS 4746 - ISS 4749 | AL08_00575, AL09_00005 | HicB                              | R        |
| ISS 4746 - ISS 4749 | AL08_00580, AL09_00010 | septum formation protein          | E        |
| ISS 4746 - ISS 4749 | AL08_00585, AL09_00015 | hypothetical protein              | R        |
| ISS 4746 - ISS 4749 | AL08_00590, AL09_00020 | hypothetical protein              |          |
| ISS 4746 - ISS 4749 | AL08_00595, AL09_00025 | hypothetical protein              |          |
| ISS 4746 - ISS 4749 | AL08_00600, AL09_00030 | hypothetical protein              |          |
| ISS 4746 - ISS 4749 | AL08_00605, AL09_00035 | abortive phage resistance protein | V        |
| ISS 4746 - ISS 4749 | AL08_00610, AL09_00040 | hypothetical protein              | V        |
| ISS 4746 - ISS 4749 | AL08_00615, AL09_00045 | hypothetical protein              | K, L     |
| ISS 4746 - ISS 4749 | AL08_00620, AL09_00050 | DNA helicase                      | K, L     |
| ISS 4746 - ISS 4749 | AL08_00625, AL09_00055 | hypothetical protein              |          |
| ISS 4746 - ISS 4749 | AL08_01090, AL09_01220 | hypothetical protein              |          |
| ISS 4746 - ISS 4749 | AL08_01320, AL09_01450 | hypothetical protein              |          |
| ISS 4746 - ISS 4749 | AL08_01880, AL09_02010 | hypothetical protein              |          |
| ISS 4746 - ISS 4749 | AL08_02000, AL09_02130 | HtaA domain protein               |          |
| ISS 4746 - ISS 4749 | AL08_02005, AL09_02135 | hypothetical protein              |          |
| ISS 4746 - ISS 4749 | AL08_02115, AL09_02245 | hypothetical protein              |          |
| ISS 4746 - ISS 4749 | AL08_02520, AL09_02635 | cell-surface hemin receptor       |          |
| ISS 4746 - ISS 4749 | AL08_02685, AL09_02805 | hypothetical protein              |          |
| ISS 4746 - ISS 4749 | AL08_02700, AL09_02820 | hypothetical protein              |          |
| ISS 4746 - ISS 4749 | AL08_02955, AL09_03075 | hypothetical protein              |          |

| Strain              | Locus                  | Function                                      | COG Code |
|---------------------|------------------------|-----------------------------------------------|----------|
| ISS 4746 - ISS 4749 | AL08_02965, AL09_03085 | hypothetical protein                          |          |
| ISS 4746 - ISS 4749 | AL08_03380, AL09_03430 | tyrosine recombinase XerC                     |          |
| ISS 4746 - ISS 4749 | AL08_03385, AL09_03470 | hypothetical protein                          |          |
| ISS 4746 - ISS 4749 | AL08_03490, AL09_03575 | hypothetical protein                          |          |
| ISS 4746 - ISS 4749 | AL08_03495, AL09_03580 | hypothetical protein                          |          |
| ISS 4746 - ISS 4749 | AL08_03500, AL09_03585 | hypothetical protein                          |          |
| ISS 4746 - ISS 4749 | AL08_04555, AL09_04640 | hypothetical protein                          |          |
| ISS 4746 - ISS 4749 | AL08_04880, AL09_04965 | TetR family transcriptional regulator         |          |
| ISS 4746 - ISS 4749 | AL08_05405, AL09_05490 | hypothetical protein                          | C        |
| ISS 4746 - ISS 4749 | AL08_05425, AL09_05510 | hypothetical protein                          |          |
| ISS 4746 - ISS 4749 | AL08_05840, AL09_05925 | hypothetical protein                          |          |
| ISS 4746 - ISS 4749 | AL08_06120, AL09_06200 | transposase IS1249                            | L        |
| ISS 4746 - ISS 4749 | AL08_06125, AL09_06205 | transposase                                   |          |
| ISS 4746 - ISS 4749 | AL08_06200, AL09_06275 | transposase                                   |          |
| ISS 4746 - ISS 4749 | AL08_06245, AL09_06320 | hypothetical protein                          |          |
| ISS 4746 - ISS 4749 | AL08_07005, AL09_07050 | cell-surface hemin receptor                   |          |
| ISS 4746 - ISS 4749 | AL08_07590, AL09_07635 | hypothetical protein                          |          |
| ISS 4746 - ISS 4749 | AL08_07595, AL09_07640 | hypothetical protein                          | S        |
| ISS 4746 - ISS 4749 | AL08_07600, AL09_07645 | hypothetical protein                          |          |
| ISS 4746 - ISS 4749 | AL08_07605, AL09_07650 | transposase                                   | L        |
| ISS 4746 - ISS 4749 | AL08_07610, AL09_07655 | transposase                                   | L        |
| ISS 4746 - ISS 4749 | AL08_07620, AL09_07665 | hypothetical protein                          |          |
| ISS 4746 - ISS 4749 | AL08_07625, AL09_07670 | hypothetical protein                          |          |
| ISS 4746 - ISS 4749 | AL08_07630, AL09_07675 | hypothetical protein                          |          |
| ISS 4746 - ISS 4749 | AL08_07635, AL09_07680 | hypothetical protein                          | M        |
| ISS 4746 - ISS 4749 | AL08_07640, AL09_07685 | hypothetical protein                          | S        |
| ISS 4746 - ISS 4749 | AL08_07645, AL09_07690 | hypothetical protein                          |          |
| ISS 4746 - ISS 4749 | AL08_07650, AL09_07695 | hypothetical protein                          |          |
| ISS 4746 - ISS 4749 | AL08_08290, AL09_08335 | hypothetical protein                          |          |
| ISS 4746 - ISS 4749 | AL08_08295, AL09_08340 | hypothetical protein                          |          |
| ISS 4746 - ISS 4749 | AL08_08300, AL09_08345 | 3-oxoacyl-ACP synthase                        |          |
| ISS 4746 - ISS 4749 | AL08_08310, AL09_08355 | acyl-CoA dehydrogenase                        | I        |
| ISS 4746 - ISS 4749 | AL08_08315, AL09_08360 | MFS transporter permease                      |          |
| ISS 4746 - ISS 4749 | AL08_08320, AL09_08365 | transposase                                   | L        |
| ISS 4746 - ISS 4749 | AL08_08335, AL09_08380 | transposase                                   |          |
| ISS 4746 - ISS 4749 | AL08_08340, AL09_08385 | transposase                                   |          |
| ISS 4746 - ISS 4749 | AL08_08525, AL09_08570 | hypothetical protein                          |          |
| ISS 4746 - ISS 4749 | AL08_08840, AL09_08885 | hypothetical protein                          |          |
| ISS 4746 - ISS 4749 | AL08_08890, AL09_08935 | phosphate ABC transporter ATP-binding protein | P        |
| ISS 4746 - ISS 4749 | AL08_08895, AL09_08940 | phosphate ABC transporter permease            | P        |
| ISS 4746 - ISS 4749 | AL08_08900, AL09_08945 | phosphate ABC transporter permease            | P        |
| ISS 4746 - ISS 4749 | AL08_08905, AL09_08950 | ABC transporter substrate-binding protein     | P        |
| ISS 4746 - ISS 4749 | AL08_09050, AL09_09095 | hypothetical protein                          |          |
| ISS 4746 - ISS 4749 | AL08_09055, AL09_09100 | stress-responsive transcriptional regulator   | K, T     |
| ISS 4746 - ISS 4749 | AL08_09085, AL09_09130 | hypothetical protein                          |          |
| ISS 4746 - ISS 4749 | AL08_09210, AL09_09255 | hypothetical protein                          |          |
| ISS 4746 - ISS 4749 | AL08_09335, AL09_09380 | surface-anchored membrane protein             |          |
| ISS 4746 - ISS 4749 | AL08_09345, AL09_09390 | fimbrial associated sortase                   | M        |
| ISS 4746 - ISS 4749 | AL08_09350, AL09_09395 | surface-anchored fimbrial subunit             |          |

| Strain              | Locus                  | Function                                                  | COG Code |
|---------------------|------------------------|-----------------------------------------------------------|----------|
| ISS 4746 - ISS 4749 | AL08_09360, AL09_09405 | lipase                                                    |          |
| ISS 4746 - ISS 4749 | AL08_09370, AL09_09415 | hypothetical protein                                      |          |
| ISS 4746 - ISS 4749 | AL08_09375, AL09_09420 | hypothetical protein                                      |          |
| ISS 4746 - ISS 4749 | AL08_09380, AL09_09425 | transposase                                               |          |
| ISS 4746 - ISS 4749 | AL08_09390, AL09_09435 | hypothetical protein                                      |          |
| ISS 4746 - ISS 4749 | AL08_09395, AL09_09440 | hypothetical protein                                      |          |
| ISS 4746 - ISS 4749 | AL08_09400, AL09_09445 | hypothetical protein                                      |          |
| ISS 4746 - ISS 4749 | AL08_09405, AL09_09450 | hypothetical protein                                      |          |
| ISS 4746 - ISS 4749 | AL08_09415, AL09_09460 | hypothetical protein                                      | V        |
| ISS 4746 - ISS 4749 | AL08_09420, AL09_09465 | 12-oxophytodienoate reductase                             | J, C     |
| ISS 4746 - ISS 4749 | AL08_09425, AL09_09470 | excinuclease ABC subunit A                                | L        |
| ISS 4746 - ISS 4749 | AL08_09430, AL09_09475 | transposase                                               | R        |
| ISS 4746 - ISS 4749 | AL08_09435, AL09_09480 | peptidase M20                                             | R        |
| ISS 4746 - ISS 4749 | AL08_09440, AL09_09485 | DNA repair ATPase                                         | D        |
| ISS 4746 - ISS 4749 | AL08_09445, AL09_09490 | restriction endonuclease                                  | V        |
| ISS 4746 - ISS 4749 | AL08_09450, AL09_09495 | DNA methyltransferase                                     | L        |
| ISS 4746 - ISS 4749 | AL08_09455, AL09_11325 | transposase                                               |          |
| ISS 4746 - ISS 4749 | AL08_09460, AL09_09500 | hypothetical protein                                      |          |
| ISS 4746 - ISS 4749 | AL08_09465, AL09_09505 | hypothetical protein                                      |          |
| ISS 4746 - ISS 4749 | AL08_09470, AL09_09510 | hypothetical protein                                      |          |
| ISS 4746 - ISS 4749 | AL08_09590, AL09_09630 | surface anchored protein                                  |          |
| ISS 4746 - ISS 4749 | AL08_09605, AL09_09650 | surface-anchored fimbrial associated protein              |          |
| ISS 4746 - ISS 4749 | AL08_09660, AL09_09700 | hypothetical protein                                      |          |
| ISS 4746 - ISS 4749 | AL08_09665, AL09_09705 | hypothetical protein                                      |          |
| ISS 4746 - ISS 4749 | AL08_09670, AL09_09710 | transporter                                               | E, G     |
| ISS 4746 - ISS 4749 | AL08_09675, AL09_09715 | oxidoreductase                                            | I        |
| ISS 4746 - ISS 4749 | AL08_09680, AL09_09720 | hypothetical protein                                      | S        |
| ISS 4746 - ISS 4749 | AL08_09685, AL09_09725 | GntR family transcriptional regulator                     | K        |
| ISS 4746 - ISS 4749 | AL08_09690, AL09_09730 | D-amino acid dehydrogenase subunit                        | R, E     |
| ISS 4746 - ISS 4749 | AL08_09695, AL09_09735 | hypothetical protein                                      | E        |
| ISS 4746 - ISS 4749 | AL08_09700, AL09_09740 | hypothetical protein                                      |          |
| ISS 4746 - ISS 4749 | AL08_09710, AL09_09750 | hypothetical protein                                      |          |
| ISS 4746 - ISS 4749 | AL08_09730, AL09_09755 | hypothetical protein                                      |          |
| ISS 4746 - ISS 4749 | AL08_09765, AL09_09790 | hypothetical protein                                      |          |
| ISS 4746 - ISS 4749 | AL08_09970, AL09_10015 | hypothetical protein                                      |          |
| ISS 4746 - ISS 4749 | AL08_10035, AL09_10080 | hypothetical protein                                      |          |
| ISS 4746 - ISS 4749 | AL08_10090, AL09_10135 | hypothetical protein                                      |          |
| ISS 4746 - ISS 4749 | AL08_10185, AL09_10225 | spermidine/putrescine ABC transporter ATP-binding protein | H, P     |
| ISS 4746 - ISS 4749 | AL08_10190, AL09_10230 | ABC transporter permease                                  | P        |
| ISS 4746 - ISS 4749 | AL08_10195, AL09_10235 | ABC transporter substrate-binding protein                 | P        |
| ISS 4746 - ISS 4749 | AL08_10205, AL09_10245 | peptidylprolyl isomerase                                  | R, K     |
| ISS 4746 - ISS 4749 | AL08_10215, AL09_10255 | transposase                                               |          |
| ISS 4746 - ISS 4749 | AL08_10220, AL09_10260 | transposase                                               | L        |
| ISS 4746 - ISS 4749 | AL08_10225, AL09_10265 | transposase                                               | L        |
| ISS 4746 - ISS 4749 | AL08_10230, AL09_10270 | hypothetical protein                                      |          |
| ISS 4746 - ISS 4749 | AL08_10235, AL09_10275 | hypothetical protein                                      |          |
| ISS 4746 - ISS 4749 | AL08_10240, AL09_10280 | hypothetical protein                                      |          |
| ISS 4746 - ISS 4749 | AL08_10245, AL09_10285 | hypothetical protein                                      |          |
| ISS 4746 - ISS 4749 | AL08_10250, AL09_10290 | surface-anchored protein                                  |          |



| Strain              | Locus                  | Function                                  | COG Code |
|---------------------|------------------------|-------------------------------------------|----------|
| ISS 4746 - ISS 4749 | AL08_10270, AL09_10310 | collagen-binding protein                  | M        |
| ISS 4746 - ISS 4749 | AL08_10290, AL09_10335 | methylase                                 |          |
| ISS 4746 - ISS 4749 | AL08_10625, AL09_10675 | DNA-binding protein                       | K        |
| ISS 4746 - ISS 4749 | AL08_10675, AL09_10720 | DNA-binding protein                       |          |
| ISS 4746 - ISS 4749 | AL08_10690, AL09_10735 | type I restriction endonuclease subunit S | V        |
| ISS 4746 - ISS 4749 | AL08_10770, AL09_10815 | SWI/SNF complex subunit SMARCC2           |          |
| ISS 4746 - ISS 4749 | AL08_11105, AL09_11155 | hypothetical protein                      | G        |
| ISS 4746 - ISS 4749 | AL08_11135, AL09_11185 | membrane protein                          | L        |
| ISS 4746 - ISS 4749 | AL08_11295, AL09_00165 | hypothetical protein                      |          |
| ISS 4746 - ISS 4749 | AL08_11300, AL09_00170 | hypothetical protein                      |          |
| ISS 4746 - ISS 4749 | AL08_11305, AL09_00175 | hypothetical protein                      |          |
| ISS 4746 - ISS 4749 | AL08_11310, AL09_00180 | hypothetical protein                      |          |
| ISS 4746 - ISS 4749 | AL08_11315, AL09_00185 | hypothetical protein                      |          |
| ISS 4746 - ISS 4749 | AL08_11320, AL09_00190 | hypothetical protein                      |          |
| ISS 4746 - ISS 4749 | AL08_11325, AL09_00195 | hypothetical protein                      |          |
| ISS 4746 - ISS 4749 | AL08_11335, AL09_00205 | hypothetical protein                      |          |
| ISS 4746 - ISS 4749 | AL08_11340, AL09_11265 | hypothetical protein                      |          |
| ISS 4746 - ISS 4749 | AL08_11345, AL09_11260 | hypothetical protein                      |          |
| ISS 4746 - ISS 4749 | AL08_11350, AL09_11255 | type II restriction endonuclease          |          |
| ISS 4746 - ISS 4749 | AL08_11355, AL09_11250 | modification methylase Sall               | V        |
| ISS 4746 - ISS 4749 | AL08_11375, AL09_03435 | hypothetical protein                      |          |
| ISS 4746 - ISS 4749 | AL08_11380, AL09_03440 | hypothetical protein                      |          |
| ISS 4746 - ISS 4749 | AL08_11385, AL09_03445 | integrase                                 |          |
| ISS 4746 - ISS 4749 | AL08_11390, AL09_03450 | hypothetical protein                      |          |
| ISS 4746 - ISS 4749 | AL08_11395, AL09_03455 | hypothetical protein                      |          |
| ISS 4746 - ISS 4749 | AL08_11410, AL09_03460 | hypothetical protein                      |          |
| ISS 4746 - ISS 4749 | AL08_11415, AL09_03465 | hypothetical protein                      |          |
| ISS 4746 - ISS 4749 | AL08_11435, AL09_11270 | hypothetical protein                      | L        |

#### Details of COG codes:

##### CELLULAR PROCESSES AND SIGNALING

- [D] Cell cycle control, cell division, chromosome partitioning
- [M] Cell wall/membrane/envelope biogenesis
- [N] Cell motility
- [O] Post-translational modification, protein turnover, and chaperones
- [T] Signal transduction mechanisms
- [U] Intracellular trafficking, secretion, and vesicular transport
- [V] Defense mechanisms
- [W] Extracellular structures
- [Y] Nuclear structure
- [Z] Cytoskeleton

##### INFORMATION STORAGE AND PROCESSING

- [A] RNA processing and modification
- [B] Chromatin structure and dynamics
- [J] Translation, ribosomal structure and biogenesis
- [K] Transcription
- [L] Replication, recombination and repair

##### METABOLISM

- [C] Energy production and conversion
- [E] Amino acid transport and metabolism
- [F] Nucleotide transport and metabolism
- [G] Carbohydrate transport and metabolism
- [H] Coenzyme transport and metabolism
- [I] Lipid transport and metabolism
- [P] Inorganic ion transport and metabolism
- [Q] Secondary metabolites biosynthesis, transport, and catabolism

##### POORLY CHARACTERIZED

- [R] General function prediction only
- [S] Function unknown
