# Supplementary material for: Adherence and invasive properties of Corynebacterium diphtheriae strains correlates with the predicted membrane-associated and secreted proteome
Source: PubMed Central journal article supplement (PMC4600297; doi:10.1186/s12864-015-1980-8), 2015-10-09
Supplement: 12864_2015_1980_MOESM2_ESM.pdf [file 12864_2015_1980_MOESM2_ESM.pdf]

**Table S2. Details of *C. diphtheriae* strains**

| Strain                         | Biovar      | Country | Year of isolation | GenBank accession no. | ST  | tox gene | Source                         | Reference  |
|--------------------------------|-------------|---------|-------------------|-----------------------|-----|----------|--------------------------------|------------|
| PW8                            | mitis       | USA     | 1896              | CP003216              | 44  | +        | Diphtheria                     | [1]        |
| NCTC 03529                     | mitis       | UK      | < 1932            | AJGI000000000         | -   | +        | Diphtheria                     | [2]        |
| NCTC 05011                     | intermedius | UK      | < 1932            | AJVH010000000         | 143 | +        | Diphtheria                     | [3]        |
| C7 ( $\beta$ ) <sup>tox+</sup> | mitis       |         | 1954              | CP003210              | 26  | +        | Lab strain                     | [1]        |
| 31A                            | -           | Brazil  | 1978              | CP003206              | -   | +        | Diphtheria                     | [1]        |
| NCTC 13129                     | gravis      | UK      | 1997              | BX248353              | 8   | +        | Diphtheria                     | [4]        |
| CDC E8392                      | mitis       | USA     |                   | CP003211              | 50  | +        | Diphtheria                     | [1]        |
| 241                            | -           | Brazil  | 1981              | CP003207              | 175 | -        | Diphtheria                     | [1]        |
| VA01                           | gravis      | Brazil  | 1999              | CP003217              | 80  | -        | Diphtheria                     | [1]        |
| HC01                           | mitis       | Brazil  | 1993              | CP003212              | 175 | -        | Fatal endocarditis             | [1]        |
| HC02                           | mitis       | Brazil  | 1999              | CP003213              | 176 | -        | Endocarditis                   | [1]        |
| HC03                           | mitis       | Brazil  | 2000              | CP003214              | 171 | -        | Endocarditis                   | [1]        |
| HC04                           | gravis      | Brazil  | 2003              | CP003215              | 128 | -        | Fatal endocarditis             | [1]        |
| INCA 402                       | belfanti    | Brazil  | 2000              | CP003208              | 173 | -        | Pneumonia (cancer patient)     | [1]        |
| BH8                            | -           | Brazil  |                   | CP003209              | 172 | -        | Antibiotic resistant           | [1]        |
| Aberdeen                       | gravis      | UK      | 2009              | AUZO000000000         | 32  | -        | Persistent sore throat         | [5]        |
| ISS 3319                       | mitis       | Italy   | 1997              | JAQO000000000         | 26  | -        | Severe pharyngitis/tonsillitis | This study |
| ISS 4060                       | gravis      | Italy   | 1999              | JAQN000000000         | 5   | -        | Severe pharyngitis/tonsillitis | This study |
| ISS 4746                       | gravis      | Italy   | < 2001            | JAQP000000000         | 32  | -        | Severe pharyngitis/tonsillitis | This study |
| ISS 4749                       | gravis      | Italy   | < 2001            | JAQQ000000000         | 32  | -        | Severe pharyngitis/tonsillitis | This study |

**Note:** ST designations for strains NCTC 03529 (*atpA*-2, *dnaE*-4, *dnaK*-70, *fusA*-6, *leuA*-7, *odhA*-16, *rpoB*-9) and 31A (*atpA*-2, *dnaE*-2, *dnaK*-New, *fusA*-3, *leuA*-3, *odhA*-2, *rpoB*-3) could not be assigned because they have new combinations of alleles.

## References

1. Trost E, Blom J, Soares Sde C, Huang IH, Al-Dilaimi A, et al. (2012) Pangenomic study of *Corynebacterium diphtheriae* that provides insights into the genomic diversity of pathogenic isolates from cases of classical diphtheria, endocarditis, and pneumonia. *J Bacteriol* 194: 3199-3215.
2. Sangal V, Tucker NP, Burkovski A, Hoskisson PA (2012) The draft genome sequence of *Corynebacterium diphtheriae* bv. mitis NCTC 3529 reveals significant diversity between the primary disease-causing biovars. *J Bacteriol* 194: 3269.
3. Sangal V, Tucker NP, Burkovski A, Hoskisson PA (2012) Draft genome sequence of *Corynebacterium diphtheriae* biovar intermedius NCTC 5011. *J Bacteriol* 194: 4738.
4. Cerdeno-Tarraga AM, Efstratiou A, Dover LG, Holden MT, Pallen M, et al. (2003) The complete genome sequence and analysis of *Corynebacterium diphtheriae* NCTC13129. *Nucleic Acids Res* 31: 6516-6523.
5. Sangal V, Burkovski A, Hunt AC, Edwards B, Blom J, et al. (2014) A lack of genetic basis for biovar differentiation in clinically important *Corynebacterium diphtheriae* from whole genome sequencing. *Infect Genet Evol* 21: 54-57.
