# Supplementary material for: Adherence and invasive properties of Corynebacterium diphtheriae strains correlates with the predicted membrane-associated and secreted proteome
Source: PubMed Central journal article supplement (PMC4600297; doi:10.1186/s12864-015-1980-8), 2015-10-09
Supplement: 12864_2015_1980_MOESM4_ESM.pdf [file 12864_2015_1980_MOESM4_ESM.pdf]

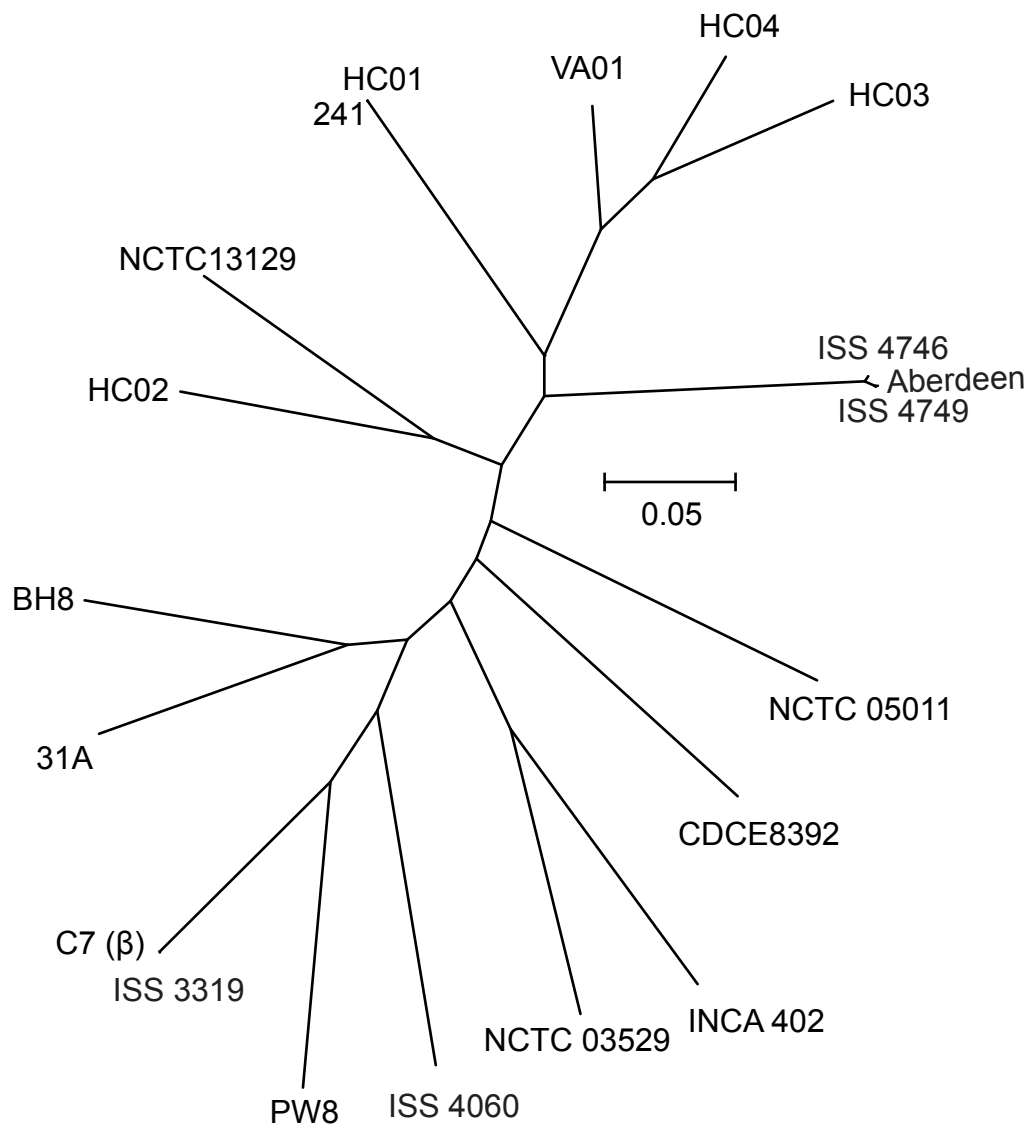

Supplementary Fig. 1. A phylogenetic tree from 400 conserved protein sequences using PhyloPhlAn.
